# Supplementary material for: Dietary and Supplement-Based Complementary and Alternative Medicine Use in Pediatric Autism Spectrum Disorder
Source: PubMed Central journal article supplement (PMC6724073; doi:10.3390/nu11081783), 2019-08-01
Supplement: nutrients-11-01783-s001.pdf [file nutrients-11-01783-s001.pdf]

**Table S1.** All Supplement Use in Children with ASD

| <b>Supplement</b>              | <b>All n(%)</b> | <b>Male n(%)</b> | <b>Female n(%)</b> | <b><i>p</i></b> |
|--------------------------------|-----------------|------------------|--------------------|-----------------|
| Multivitamin                   | 130 (77.8)      | 96 (79.3)        | 34 (73.9)          | .532            |
| Calcium                        | 21 (12.6)       | 11 (9.1)         | 10 (21.7)          | <b>.037</b>     |
| Magnesium                      | 47 (28.1)       | 32 (26.4)        | 15 (32.6)          | .446            |
| Vitamin A                      | 12 (7.2)        | 8 (6.6)          | 4 (8.7)            | .738            |
| Vitamin D                      | 75 (44.9)       | 54 (44.6)        | 21 (45.7)          | 1.000           |
| Vitamin C                      | 37 (22.2)       | 26 (21.5)        | 11 (23.9)          | .835            |
| Vitamin B                      | 31 (18.6)       | 19 (15.7)        | 12 (26.1)          | .180            |
| Vitamin K                      | 7 (4.2)         | 2 (1.7)          | 5 (10.9)           | <b>.018</b>     |
| Iron                           | 34 (20.4)       | 21 (17.4)        | 13 (28.3)          | .135            |
| Zinc                           | 22 (13.2)       | 14 (11.6)        | 8 (17.4)           | .317            |
| Folic Acid                     | 7 (4.2)         | 5 (4.1)          | 2 (4.3)            | 1.000           |
| Antioxidants (e.g. vitamin E)  | 16 (9.6)        | 10 (8.3)         | 6 (13.0)           | .213            |
| Amino Acids                    | 8 (4.8)         | 5 (4.1)          | 3 (6.5)            | .686            |
| Creatine                       | 6 (3.6)         | 5 (4.1)          | 1 (2.2)            | 1.000           |
| Protein Powders                | 18 (10.8)       | 12 (9.9)         | 6 (13.0)           | .581            |
| Omega 3                        | 71 (42.5)       | 50 (41.3)        | 21 (45.7)          | .726            |
| Omega 6                        | 31 (18.6)       | 21 (17.4)        | 10 (21.7)          | .511            |
| Fibre                          | 28 (16.8)       | 16 (13.2)        | 12 (26.1)          | .063            |
| Vitaminized Water              | 4 (2.4)         | 3 (2.5)          | 1 (2.2)            | 1.000           |
| Energy Drinks (e.g. Redbull)   | 2 (1.2)         | 1 (0.8)          | 1 (2.2)            | .476            |
| Probiotics                     | 61 (36.5)       | 44 (36.4)        | 17 (37.0)          | 1.000           |
| Meal Replacement (e.g. Ensure) | 29 (17.4)       | 22 (18.2)        | 7 (15.2)           | .820            |

Intakes are presented as the number of children (%) who have or are currently consuming each dietary supplement. Male and female are presented as percent within gender. Differences between genders were determined using a Fisher's Exact test.  $p < 0.05$  was considered significant. Significant difference are bolded.

**Table S2.** Supplements listed in the “Other” Category by Parents

| <b>Supplement</b>        | <b>All n(%)</b> | <b>Male n(%)</b> | <b>Female n(%)</b> | <b><i>p</i></b> |
|--------------------------|-----------------|------------------|--------------------|-----------------|
| Melatonin                | 27 (16.2)       | 19 (15.7)        | 8 (17.4)           | .636            |
| Digestive Enzymes        | 2 (1.2)         | 1 (0.8)          | 1 (2.2)            | n/a             |
| Sodium Butyrate          | 1 (0.6)         | 1 (0.8)          | 0 (0.0)            | n/a             |
| Thiamine                 | 1 (0.6)         | 1 (0.8)          | 0 (0.0)            | n/a             |
| Feverfew                 | 1 (0.6)         | 1 (0.8)          | 0 (0.0)            | n/a             |
| Fluoride                 | 1 (0.6)         | 1 (0.8)          | 0 (0.0)            | n/a             |
| N-Acetyl Cysteine        | 1 (0.6)         | 0 (0.0)          | 1 (2.2)            | n/a             |
| 5HTP                     | 1 (0.6)         | 0 (0.0)          | 1 (2.2)            | n/a             |
| Alpha Lipoic Acid        | 1 (0.6)         | 1 (0.8)          | 0 (0.0)            | n/a             |
| Inulin                   | 1 (0.6)         | 1 (0.8)          | 0 (0.0)            | n/a             |
| Olive Oil                | 2 (1.2)         | 1 (0.8)          | 1 (2.2)            | n/a             |
| L-Methyl Folate          | 1 (0.6)         | 1 (0.8)          | 0 (0.0)            | n/a             |
| Adrenal Cortex           | 1 (0.6)         | 1 (0.8)          | 0 (0.0)            | n/a             |
| Selenium                 | 1 (0.6)         | 1 (0.8)          | 0 (0.0)            | n/a             |
| Milk Thistle             | 1 (0.6)         | 1 (0.8)          | 0 (0.0)            | n/a             |
| Liposomal Curcumin       | 1 (0.6)         | 1 (0.8)          | 0 (0.0)            | n/a             |
| Cannabidiol              | 1 (0.6)         | 1 (0.8)          | 0 (0.0)            | n/a             |
| Calorie Powder           | 1 (0.6)         | 0 (0.0)          | 1 (2.2)            | n/a             |
| Polyethylene Glycol 3350 | 1 (0.6)         | 1 (0.8)          | 0 (0.0)            | n/a             |
| Elderberry               | 1 (0.6)         | 1 (0.8)          | 0 (0.0)            | n/a             |
| Fermented Foods          | 1 (0.6)         | 1 (0.8)          | 0 (0.0)            | n/a             |
| Super Sleep              | 1 (0.6)         | 1 (0.8)          | 0 (0.0)            | n/a             |
| RestoraLAX               | 1 (0.6)         | 0 (0.0)          | 1 (2.2)            | n/a             |
| Spearmint Leaf Tea       | 1 (0.6)         | 0 (0.0)          | 1 (2.2)            | n/a             |

Intakes are presented as the number of children (%) who have or are currently consuming each dietary supplement. Male and female are presented as percent within gender. No differences between genders were determined.
